# Supplementary material for: Cell fate decision by a morphogen-transcription factor-chromatin modifier axis
Source: Research Square preprint supplement (doi:10.21203/rs.3.rs-3348344/v1), 2023-10-03
Supplement: Supplementary file 1 [file a72d35affb9918ea107b8340.xlsx]

## Sheet: Fig. 4bSALL4 IP-MS FC_2  P_0.05
name	ID	BMP4IgG_vs_BMP4Sall4_p.val	BMP4IgG_vs_NCIgG_p.val	BMP4IgG_vs_NCSall4_p.val	BMP4Sall4_vs_NCIgG_p.val	BMP4Sall4_vs_NCSall4_p.val	NCSall4_vs_NCIgG_p.val	BMP4IgG_vs_BMP4Sall4_p.adj	BMP4IgG_vs_NCIgG_p.adj	BMP4IgG_vs_NCSall4_p.adj	BMP4Sall4_vs_NCIgG_p.adj	BMP4Sall4_vs_NCSall4_p.adj	NCSall4_vs_NCIgG_p.adj	BMP4IgG_vs_BMP4Sall4_significant	BMP4IgG_vs_NCIgG_significant	BMP4IgG_vs_NCSall4_significant	BMP4Sall4_vs_NCIgG_significant	BMP4Sall4_vs_NCSall4_significant	NCSall4_vs_NCIgG_significant	BMP4IgG_vs_BMP4Sall4_ratio	BMP4IgG_vs_NCIgG_ratio	BMP4IgG_vs_NCSall4_ratio	BMP4Sall4_vs_NCIgG_ratio	BMP4Sall4_vs_NCSall4_ratio	NCSall4_vs_NCIgG_ratio	BMP4IgG_centered	BMP4Sall4_centered	NCIgG_centered	NCSall4_centered
Rpl36	P47964	0.399846	0.838467	1.97777e-08	0.518015	3.46335e-08	2.25382e-08	0.819	0.945	8.83e-14	0.901	7.25e-14	1	FALSE	FALSE	TRUE	FALSE	TRUE	FALSE	0.239	0.0568	4.26	-0.182	4.02	-4.2	1.14	0.901	1.08	-3.12
Apc	Q61315	0.50613	0.0533247	1.68581e-07	0.164782	1.01101e-07	3.59918e-08	0.857	0.281	8.83e-14	0.751	7.25e-14	1	FALSE	FALSE	TRUE	FALSE	TRUE	FALSE	0.23	0.73	-4.2	0.5	-4.43	4.93	-0.81	-1.04	-1.54	3.39
Cep89	Q9CZX2	0.917709	0.152495	1.48206e-07	0.179725	1.36917e-07	4.92099e-08	0.921	0.668	8.83e-14	0.767	7.25e-14	1	FALSE	FALSE	TRUE	FALSE	TRUE	FALSE	0.03	0.439	-3.61	0.409	-3.64	4.05	-0.786	-0.816	-1.22	2.83
Clta	O08585	0.244236	0.0120972	6.52317e-08	0.0994458	1.59815e-07	6.92579e-07	0.709	0.0279	8.83e-14	0.637	7.25e-14	1	FALSE	FALSE	TRUE	FALSE	TRUE	FALSE	0.226	0.558	2.54	0.332	2.31	-1.98	0.831	0.605	0.273	-1.71
Ppp1cc	P63087	0.543783	0.248053	3.11726e-07	0.56326	5.22992e-07	8.76243e-07	0.867	0.797	1.69e-12	0.908	7.25e-14	1	FALSE	FALSE	TRUE	FALSE	TRUE	FALSE	0.147	0.287	2.76	0.14	2.62	-2.48	0.8	0.653	0.512	-1.96
Lrrc48	Q9D5E4	3.4813e-06	0.768996	0.260646	4.72715e-06	1.1211e-06	0.165899	3.87e-14	0.94	0.915	8.66e-13	7.25e-14	1	TRUE	FALSE	FALSE	TRUE	TRUE	FALSE	5.72	0.19	-0.749	-5.53	-6.46	0.938	1.29	-4.43	1.1	2.04
Zc2hc1a	Q8BJH1	0.897415	6.62349e-05	3.5035e-06	7.85391e-05	4.00236e-06	0.0264171	0.92	8.19e-10	3.57e-07	1.14e-06	1.35e-10	1	FALSE	TRUE	TRUE	TRUE	TRUE	FALSE	-0.0513	-2.52	-3.52	-2.47	-3.47	1.01	-1.52	-1.47	0.994	2
Gar1	Q9CY66	0.596867	0.445915	7.87276e-06	0.209835	4.44267e-06	1.90645e-05	0.878	0.892	4.5e-06	0.794	2.1e-10	1	FALSE	FALSE	TRUE	FALSE	TRUE	FALSE	-0.223	0.324	3.39	0.547	3.62	-3.07	0.874	1.1	0.55	-2.52
Crybb1	Q9WVJ5	0.193909	0.103964	2.03601e-05	0.00971852	4.46207e-06	0.00019797	0.642	0.534	6.42e-05	0.0944	2.14e-10	1	FALSE	FALSE	TRUE	FALSE	TRUE	FALSE	-0.5	0.642	2.68	1.14	3.18	-2.04	0.705	1.21	0.0635	-1.97
Isg20l2	Q3U1G5	0.634295	0.492355	1.69737e-05	0.828793	9.79904e-06	7.70511e-06	0.886	0.903	4.09e-05	0.933	1.26e-08	1	FALSE	FALSE	TRUE	FALSE	TRUE	FALSE	0.206	0.299	-3.2	0.0932	-3.41	3.5	-0.673	-0.879	-0.973	2.53
Edn1	P22387	0.159139	0.747369	2.55942e-06	0.0935533	1.24878e-05	1.86266e-06	0.578	0.938	1.06e-07	0.621	3.65e-08	1	FALSE	FALSE	TRUE	FALSE	TRUE	FALSE	-0.466	0.101	-2.88	0.567	-2.42	2.98	-0.811	-0.346	-0.913	2.07
Ckap2	Q3V1H1	0.931551	0.778931	1.53034e-05	0.84525	1.38517e-05	1.10765e-05	0.922	0.941	3.12e-05	0.935	5.43e-08	1	FALSE	FALSE	TRUE	FALSE	TRUE	FALSE	0.0432	0.141	-3.78	0.0982	-3.82	3.92	-0.898	-0.941	-1.04	2.88
Rpl39	P62892	9.50637e-06	0.644251	0.694902	5.71841e-06	1.48951e-05	0.399537	3.87e-14	0.927	0.952	2.64e-12	7e-08	1	TRUE	FALSE	FALSE	TRUE	TRUE	FALSE	-6.13	0.359	-0.304	6.49	5.83	0.663	-1.52	4.61	-1.88	-1.21
Txlna	Q6PAM1	0.495363	0.461238	8.28849e-06	0.954402	1.82447e-05	1.95246e-05	0.853	0.896	5.1e-06	0.941	1.6e-07	1	FALSE	FALSE	TRUE	FALSE	TRUE	FALSE	0.148	0.16	1.73	0.0123	1.58	-1.57	0.509	0.361	0.349	-1.22
Gtf2f2	Q8R0A0	2.51217e-05	0.756034	0.960469	1.7312e-05	2.66838e-05	0.718973	1.54e-12	0.939	0.961	1.61e-09	7.41e-07	1	TRUE	FALSE	FALSE	TRUE	TRUE	FALSE	1.27	-0.0557	0.00887	-1.33	-1.26	-0.0646	0.306	-0.964	0.362	0.297
Esyt2	Q3TZZ7	9.45789e-06	0.567653	0.280269	5.05044e-06	3.52237e-05	0.113702	3.87e-14	0.917	0.919	1.26e-12	1.94e-06	1	TRUE	FALSE	FALSE	TRUE	TRUE	FALSE	-4.03	0.293	-0.565	4.33	3.47	0.858	-1.08	2.96	-1.37	-0.511
Col1a1	P11087	0.80754	0.130059	2.61859e-05	0.192077	3.53779e-05	0.000219874	0.91	0.615	0.000126	0.779	1.96e-06	1	FALSE	FALSE	TRUE	FALSE	TRUE	FALSE	0.148	0.974	4.28	0.826	4.14	-3.31	1.35	1.2	0.377	-2.93
Polr2c	P97760	0.246928	0.476215	0.000184779	0.635217	3.73282e-05	6.89091e-05	0.712	0.899	0.00693	0.917	2.31e-06	1	FALSE	FALSE	TRUE	FALSE	TRUE	FALSE	-0.686	-0.413	3.19	0.273	3.88	-3.61	0.524	1.21	0.937	-2.67
Hdac1	O09106	0.093973	0.52493	5.16143e-06	0.261293	4.17081e-05	1.04238e-05	0.39	0.909	1.24e-06	0.827	3.32e-06	1	FALSE	FALSE	TRUE	FALSE	TRUE	FALSE	-0.476	-0.169	-2.24	0.306	-1.77	2.07	-0.722	-0.246	-0.552	1.52
Prpf31	Q8CCF0	0.478083	0.318187	0.000125755	0.760413	4.84012e-05	3.29243e-05	0.848	0.844	0.00372	0.928	5.44e-06	1	FALSE	FALSE	TRUE	FALSE	TRUE	FALSE	-0.215	-0.307	1.75	-0.0915	1.97	-2.06	0.308	0.523	0.615	-1.45
Arl8a	Q8VEH3	2.57011e-05	9.09634e-05	0.417924	0.3348	7.30793e-05	0.000289146	1.77e-12	4.01e-09	0.935	0.859	2.11e-05	1	TRUE	TRUE	FALSE	FALSE	TRUE	FALSE	-1.89	-1.63	-0.22	0.264	1.67	-1.41	-0.936	0.958	0.694	-0.716
Tra2a	Q6PFR5	0.784851	0.923604	5.35699e-05	0.712757	7.66296e-05	4.73612e-05	0.908	0.95	0.000745	0.924	2.43e-05	1	FALSE	FALSE	TRUE	FALSE	TRUE	FALSE	0.0981	-0.0344	2.33	-0.132	2.23	-2.36	0.598	0.5	0.633	-1.73
Opa1	P58281	0.107299	0.46437	0.0012304	0.0297594	9.64422e-05	0.00420506	0.438	0.896	0.0796	0.3	4.82e-05	1	FALSE	FALSE	FALSE	FALSE	TRUE	FALSE	-0.311	0.134	0.781	0.445	1.09	-0.647	0.151	0.462	0.017	-0.63
Ksr1	Q61097	0.743697	0.00602539	0.000162383	0.00344039	0.000103246	0.0400434	0.903	0.0067	0.00569	0.022	5.82e-05	1	FALSE	TRUE	TRUE	TRUE	TRUE	FALSE	0.176	-1.82	-3.05	-1.99	-3.23	1.24	-1.17	-1.35	0.643	1.88
Mov10	P23249	0.817451	0.100798	9.68854e-05	0.147463	0.000132907	0.0013138	0.912	0.522	0.00231	0.729	0.000116	1	FALSE	FALSE	TRUE	FALSE	TRUE	FALSE	0.0768	0.585	2.01	0.508	1.93	-1.42	0.668	0.591	0.0826	-1.34
Adnp	Q9Z103	0.635567	0.0579452	7.97544e-05	0.129758	0.000152843	0.00175747	0.886	0.31	0.00163	0.701	0.000166	1	FALSE	FALSE	TRUE	FALSE	TRUE	FALSE	-0.155	-0.678	-2.01	-0.523	-1.86	1.33	-0.711	-0.556	-0.0335	1.3
Snx12	O70493	5.34243e-05	0.000219368	0.426519	0.31238	0.000158493	0.000735022	1.56e-10	2.14e-07	0.936	0.851	0.000181	1	TRUE	TRUE	FALSE	FALSE	TRUE	FALSE	-2.26	-1.9	-0.281	0.361	1.98	-1.62	-1.11	1.15	0.789	-0.829
Mvk	Q9R008	0.732848	0.759061	0.000299172	0.520276	0.00018261	0.000473069	0.901	0.939	0.0146	0.902	0.000261	1	FALSE	FALSE	TRUE	FALSE	TRUE	FALSE	-0.0831	0.0746	1.27	0.158	1.36	-1.2	0.316	0.399	0.242	-0.957
Pfkp	Q9WUA3	0.540707	0.477105	0.000522622	0.199901	0.000209879	0.00162772	0.866	0.899	0.0302	0.786	0.000366	1	FALSE	FALSE	TRUE	FALSE	TRUE	FALSE	-0.346	0.404	2.73	0.75	3.08	-2.33	0.698	1.04	0.294	-2.04
Zak	Q9ESL4	0.502794	0.598987	8.54128e-05	0.243788	0.000218613	4.2843e-05	0.856	0.921	0.00183	0.817	0.000402	1	FALSE	FALSE	TRUE	FALSE	TRUE	FALSE	-0.345	0.269	-3.12	0.614	-2.78	3.39	-0.799	-0.455	-1.07	2.32
Gtpbp4	Q99ME9	0.232891	0.997881	0.00164764	0.233824	0.000244975	0.00164052	0.696	0.954	0.108	0.811	0.000529	1	FALSE	FALSE	FALSE	FALSE	TRUE	FALSE	-0.406	-0.000871	1.36	0.405	1.77	-1.36	0.238	0.645	0.239	-1.12
Mta1	Q8K4B0	0.0337883	0.0989763	1.31655e-05	0.538198	0.000296237	0.000122503	0.12	0.515	2.05e-05	0.905	0.000815	1	FALSE	FALSE	TRUE	FALSE	TRUE	FALSE	-1.31	-0.972	-4.19	0.341	-2.88	3.22	-1.62	-0.307	-0.647	2.57
Arhgap1	Q5FWK3	0.738675	0.495342	0.000492992	0.723064	0.000299222	0.00017927	0.902	0.903	0.0283	0.925	0.000833	1	FALSE	FALSE	TRUE	FALSE	TRUE	FALSE	-0.117	-0.242	1.72	-0.125	1.84	-1.97	0.341	0.458	0.583	-1.38
Crym	O54983	0.574531	0.000182221	0.000140058	0.000415971	0.000314748	0.851337	0.874	1.06e-07	0.00446	0.000249	0.000927	1	FALSE	TRUE	TRUE	TRUE	TRUE	FALSE	0.15	1.48	1.53	1.33	1.38	-0.0496	0.79	0.64	-0.69	-0.74
Nes	Q6P5H2	0.59165	0.855614	0.000784719	0.720976	0.00034467	0.000591802	0.877	0.946	0.0493	0.925	0.00112	1	FALSE	FALSE	TRUE	FALSE	TRUE	FALSE	-0.166	-0.056	1.42	0.11	1.58	-1.47	0.299	0.465	0.355	-1.12
Sf3b1	Q99NB9	0.393321	0.912794	0.00135907	0.453639	0.000353098	0.00113981	0.816	0.95	0.0875	0.89	0.00117	1	FALSE	FALSE	FALSE	FALSE	TRUE	FALSE	-0.326	-0.0411	1.6	0.285	1.93	-1.64	0.308	0.634	0.349	-1.29
Stt3b	Q3TDQ1	0.03778	0.111613	0.0230959	0.532755	0.000472979	0.00126458	0.139	0.56	0.656	0.904	0.00222	1	FALSE	FALSE	FALSE	FALSE	TRUE	FALSE	-1.17	-0.851	1.31	0.315	2.47	-2.16	-0.178	0.988	0.673	-1.48
Mbd3	Q9Z2D8	0.152532	0.322206	5.85793e-05	0.623485	0.000489067	0.000235464	0.564	0.846	0.000901	0.916	0.00237	1	FALSE	FALSE	TRUE	FALSE	TRUE	FALSE	-0.586	-0.394	-2.49	0.192	-1.91	2.1	-0.868	-0.283	-0.474	1.63
Mta2	Q9R190	0.0315386	0.49523	1.93375e-05	0.104003	0.000513288	4.51968e-05	0.109	0.903	5.68e-05	0.648	0.00261	1	FALSE	FALSE	TRUE	FALSE	TRUE	FALSE	-1.1	-0.311	-3.3	0.786	-2.2	2.99	-1.18	-0.0801	-0.866	2.12
Ndufb3	Q9CQZ6	0.931914	0.861419	0.000498186	0.928896	0.00056753	0.000651048	0.923	0.947	0.0286	0.94	0.00317	1	FALSE	FALSE	TRUE	FALSE	TRUE	FALSE	0.0283	0.0579	1.63	0.0296	1.6	-1.57	0.428	0.4	0.37	-1.2
Cep170	Q6A065	0.999295	0.220815	0.000573087	0.220518	0.000573863	9.18732e-05	0.928	0.771	0.0334	0.802	0.00323	1	FALSE	FALSE	TRUE	FALSE	TRUE	FALSE	-0.00032	0.462	-1.75	0.462	-1.75	2.21	-0.321	-0.321	-0.783	1.42
Epb41l2	O70318	0.321164	0.830705	0.00367609	0.235082	0.000702512	0.00529796	0.775	0.945	0.242	0.812	0.00458	1	FALSE	FALSE	FALSE	FALSE	TRUE	FALSE	-0.347	0.073	1.25	0.42	1.6	-1.18	0.244	0.591	0.171	-1.01
Polr2a	P08775	0.000938994	0.750577	0.866783	0.000571829	0.000721748	0.880171	5.03e-05	0.938	0.958	0.000535	0.00479	1	TRUE	FALSE	FALSE	TRUE	TRUE	FALSE	-1.71	0.121	0.0638	1.83	1.77	0.0573	-0.381	1.33	-0.502	-0.445
Tcerg1	Q8CGF7	0.141627	0.232429	7.80845e-05	0.752572	0.000734475	0.000452455	0.538	0.783	0.00157	0.928	0.00492	1	FALSE	FALSE	TRUE	FALSE	TRUE	FALSE	0.459	0.366	1.83	-0.0933	1.37	-1.47	0.665	0.205	0.299	-1.17
Pdlim4	P70271	0.0741987	0.307439	0.019392	0.380962	0.00073753	0.00314308	0.308	0.838	0.622	0.873	0.00495	1	FALSE	FALSE	FALSE	FALSE	TRUE	FALSE	-1.49	-0.803	2.08	0.685	3.56	-2.88	-0.0541	1.43	0.749	-2.13
Larp1	Q6ZQ58	0.0931709	0.0339342	0.0157572	0.563128	0.000756685	0.00031263	0.387	0.149	0.578	0.908	0.00515	1	FALSE	FALSE	FALSE	FALSE	TRUE	FALSE	-1.03	-1.36	1.61	-0.332	2.64	-2.97	-0.195	0.833	1.16	-1.8
Crk	Q64010	0.240682	0.127435	0.000143582	0.687426	0.000870374	0.00166309	0.705	0.608	0.00465	0.922	0.00665	1	FALSE	FALSE	TRUE	FALSE	TRUE	FALSE	0.42	0.56	1.99	0.14	1.57	-1.43	0.742	0.322	0.183	-1.25
Myo1e	E9Q634	0.561781	0.219331	0.00231895	0.0849652	0.00089927	0.0210757	0.871	0.769	0.156	0.595	0.00704	1	FALSE	FALSE	FALSE	FALSE	TRUE	FALSE	-0.156	0.341	1.05	0.498	1.21	-0.711	0.309	0.466	-0.032	-0.743
Prpsap2	Q8R574	0.0701571	0.244727	0.0262851	0.448071	0.000917651	0.00322726	0.289	0.794	0.68	0.889	0.00729	1	FALSE	FALSE	FALSE	FALSE	TRUE	FALSE	-2.08	-1.27	2.68	0.812	4.76	-3.95	-0.17	1.91	1.1	-2.85
Rbbp4	Q60972	0.877094	0.226658	0.000783859	0.178461	0.00100012	0.000123878	0.918	0.777	0.0493	0.766	0.00855	1	FALSE	FALSE	TRUE	FALSE	TRUE	FALSE	-0.0594	0.482	-1.77	0.542	-1.71	2.25	-0.337	-0.278	-0.82	1.43
Tm9sf3	Q9ET30	0.00271187	0.862702	0.654645	0.00203443	0.00129632	0.782531	0.00102	0.947	0.95	0.00934	0.0133	1	TRUE	FALSE	FALSE	TRUE	TRUE	FALSE	1.58	-0.0709	-0.184	-1.65	-1.76	0.113	0.33	-1.25	0.401	0.514
Tor1aip1	Q921T2	0.0970934	0.212385	0.0291046	0.629587	0.0013651	0.00303756	0.402	0.761	0.698	0.916	0.0144	1	FALSE	FALSE	FALSE	FALSE	TRUE	FALSE	-1.58	-1.15	2.19	0.429	3.77	-3.34	-0.133	1.44	1.01	-2.32
Ctnnb1	Q02248	0.716157	0.173944	0.00080285	0.301563	0.00143522	0.00861916	0.899	0.708	0.0507	0.846	0.0156	1	FALSE	FALSE	FALSE	FALSE	TRUE	FALSE	0.148	0.577	1.86	0.429	1.71	-1.28	0.646	0.498	0.0688	-1.21
Gja1	P23242	0.000104429	0.2815	0.100572	2.50913e-05	0.00143972	0.0145055	6.38e-09	0.822	0.853	9.11e-09	0.0157	1	TRUE	FALSE	FALSE	TRUE	TRUE	FALSE	-4.84	0.896	-1.42	5.73	3.41	2.32	-1.34	3.5	-2.24	0.0819
Cand2	Q6ZQ73	0.329406	0.00306915	0.00785293	0.0173475	0.00145637	2.86432e-05	0.781	0.00133	0.416	0.187	0.016	1	FALSE	TRUE	FALSE	FALSE	TRUE	FALSE	0.272	1.03	-0.876	0.754	-1.15	1.9	0.105	-0.167	-0.92	0.982
Eif4g3	Q80XI3	0.00263045	0.0102882	0.726803	0.433927	0.00147736	0.00559353	0.000949	0.0204	0.953	0.886	0.0163	1	TRUE	FALSE	FALSE	FALSE	TRUE	FALSE	-1.15	-0.91	0.104	0.236	1.25	-1.01	-0.488	0.658	0.422	-0.592
Uaca	Q8CGB3	0.0188193	0.381079	0.178774	0.00397071	0.0016792	0.608224	0.0505	0.872	0.895	0.0276	0.0196	1	FALSE	FALSE	FALSE	TRUE	TRUE	FALSE	0.767	-0.252	-0.397	-1.02	-1.16	0.145	0.0297	-0.738	0.281	0.427
Ckap2l	Q7TS74	0.841384	0.111652	0.00122507	0.154874	0.00169445	0.0222946	0.914	0.56	0.0793	0.739	0.0198	1	FALSE	FALSE	FALSE	FALSE	TRUE	FALSE	-0.135	-1.15	-2.92	-1.01	-2.78	1.77	-1.05	-0.915	0.0962	1.87
Zswim8	Q3UHH1	0.00033628	0.503884	0.311409	0.000127942	0.00169702	0.108818	1.16e-06	0.905	0.923	6.67e-06	0.0199	1	TRUE	FALSE	FALSE	TRUE	TRUE	FALSE	-3.12	0.408	-0.627	3.53	2.49	1.04	-0.834	2.28	-1.24	-0.207
Mta3	Q924K8	0.52172	0.46507	0.000622338	0.184878	0.00174098	0.000207193	0.861	0.897	0.0369	0.772	0.0206	1	FALSE	FALSE	TRUE	FALSE	TRUE	FALSE	-0.302	0.345	-2.22	0.646	-1.92	2.56	-0.543	-0.242	-0.888	1.67
Snx9	Q91VH2	0.217964	0.448683	0.000243982	0.610524	0.00176144	0.000775595	0.677	0.893	0.0108	0.914	0.0209	1	FALSE	FALSE	TRUE	FALSE	TRUE	FALSE	0.584	0.35	2.45	-0.234	1.87	-2.1	0.847	0.263	0.497	-1.61
Prpf6	Q91YR7	0.300909	0.199954	0.0123934	0.0333471	0.00200838	0.126562	0.761	0.746	0.525	0.329	0.0251	1	FALSE	FALSE	FALSE	FALSE	TRUE	FALSE	-0.337	0.424	0.939	0.761	1.28	-0.515	0.256	0.594	-0.168	-0.682
Slc9a3r1	P70441	0.690835	0.281845	0.00105347	0.48344	0.0020116	0.00668942	0.895	0.823	0.0684	0.896	0.0251	1	FALSE	FALSE	FALSE	FALSE	TRUE	FALSE	0.111	0.309	1.23	0.198	1.12	-0.925	0.414	0.302	0.104	-0.82
Mesdc2	Q9ERE7	0.419539	0.850702	0.00829194	0.324977	0.00205289	0.0115315	0.827	0.946	0.429	0.855	0.0258	1	FALSE	FALSE	FALSE	FALSE	TRUE	FALSE	-0.306	0.0702	1.19	0.376	1.5	-1.12	0.238	0.544	0.168	-0.951
Nampt	Q99KQ4	0.575659	0.911916	0.00595978	0.65181	0.00229107	0.00492652	0.874	0.95	0.35	0.919	0.0296	1	FALSE	FALSE	FALSE	FALSE	TRUE	FALSE	-0.271	-0.0532	1.63	0.218	1.9	-1.68	0.326	0.597	0.379	-1.3
Tcaf1	Q8BNE1	0.00675102	0.0418206	0.545779	0.000184497	0.00239426	0.11878	0.00799	0.204	0.945	2.23e-05	0.0312	1	TRUE	FALSE	FALSE	TRUE	TRUE	FALSE	-1.7	1.17	0.314	2.87	2.02	0.855	-0.0549	1.65	-1.22	-0.368
Sumo2	P61957	0.827242	0.178707	0.00360606	0.125733	0.00249813	0.0423315	0.913	0.716	0.238	0.694	0.0328	1	FALSE	FALSE	FALSE	FALSE	TRUE	FALSE	-0.261	1.68	4.39	1.94	4.65	-2.7	1.45	1.71	-0.23	-2.93
Acy3	Q91XE4	0.905111	0.768585	0.00306559	0.860693	0.00251084	0.00187773	0.92	0.94	0.206	0.936	0.033	1	FALSE	FALSE	FALSE	FALSE	TRUE	FALSE	-0.0557	-0.138	1.76	-0.082	1.82	-1.9	0.392	0.448	0.53	-1.37
Itpr3	P70227	0.040217	0.356575	0.133601	0.19545	0.00253112	0.0264068	0.15	0.862	0.875	0.782	0.0333	1	FALSE	FALSE	FALSE	FALSE	TRUE	FALSE	-0.706	-0.29	0.49	0.416	1.2	-0.78	-0.127	0.579	0.163	-0.616
Nup155	Q99P88	0.41025	0.910532	0.0111842	0.473943	0.00265052	0.00918493	0.823	0.95	0.501	0.894	0.035	1	FALSE	FALSE	FALSE	FALSE	TRUE	FALSE	-0.325	-0.0436	1.17	0.282	1.5	-1.22	0.201	0.526	0.244	-0.971
Hn1l	Q6PGH2	0.286923	0.401	0.0177691	0.809499	0.00266839	0.00400926	0.75	0.879	0.604	0.932	0.0352	1	FALSE	FALSE	FALSE	FALSE	TRUE	FALSE	-0.479	-0.373	1.2	0.105	1.68	-1.58	0.0879	0.567	0.461	-1.12
Marcks	P26645	0.618791	0.701449	0.00629114	0.385157	0.00268304	0.0123155	0.883	0.934	0.363	0.874	0.0354	1	FALSE	FALSE	FALSE	FALSE	TRUE	FALSE	-0.369	0.283	2.47	0.652	2.84	-2.18	0.595	0.964	0.312	-1.87
Smarca4	Q3TKT4	0.240066	0.799461	0.0226983	0.34647	0.00274737	0.0144804	0.704	0.942	0.653	0.863	0.0363	1	FALSE	FALSE	FALSE	FALSE	TRUE	FALSE	-0.348	-0.0727	0.749	0.275	1.1	-0.821	0.0819	0.43	0.155	-0.667
Fubp1	Q91WJ8	0.666404	0.473582	0.005831	0.261846	0.00279118	0.020816	0.891	0.899	0.345	0.828	0.0369	1	FALSE	FALSE	FALSE	FALSE	TRUE	FALSE	-0.153	0.256	1.2	0.409	1.35	-0.942	0.325	0.478	0.0691	-0.873
Glrx	Q9QUH0	0.289589	0.609382	0.0188014	0.130688	0.00284533	0.0465532	0.752	0.923	0.616	0.702	0.0377	1	FALSE	FALSE	FALSE	FALSE	TRUE	FALSE	0.286	-0.135	-0.715	-0.421	-1	0.58	-0.141	-0.427	-0.00606	0.574
Sh3bgrl3	Q91VW3	0.121279	0.100241	0.0504473	0.908799	0.00284772	0.00235212	0.483	0.52	0.78	0.938	0.0377	1	FALSE	FALSE	FALSE	FALSE	TRUE	FALSE	-1.26	-1.35	1.66	-0.0877	2.92	-3.01	-0.239	1.02	1.11	-1.9
Stra6	O70491	0.00931869	0.661761	0.50335	0.00435691	0.00291535	0.812634	0.0154	0.929	0.942	0.0316	0.0386	1	TRUE	FALSE	FALSE	TRUE	TRUE	FALSE	1.27	-0.179	-0.275	-1.45	-1.55	0.0965	0.204	-1.07	0.383	0.479
Rbbp7	Q60973	0.468653	0.507642	0.000890227	0.180169	0.00294368	0.000320485	0.845	0.906	0.0571	0.768	0.039	1	FALSE	FALSE	FALSE	FALSE	TRUE	FALSE	-0.25	0.228	-1.54	0.478	-1.29	1.77	-0.391	-0.141	-0.619	1.15
Sdf2	Q9DCT5	0.98911	0.881911	0.00304539	0.892675	0.00311611	0.00391524	0.927	0.948	0.204	0.938	0.0419	1	FALSE	FALSE	FALSE	FALSE	TRUE	FALSE	0.00583	0.0635	1.61	0.0577	1.61	-1.55	0.421	0.415	0.357	-1.19
Pdcd11	Q6NS46	0.824652	0.802352	0.00462795	0.976975	0.00317551	0.00302499	0.912	0.942	0.292	0.942	0.0429	1	FALSE	FALSE	FALSE	FALSE	TRUE	FALSE	-0.0946	-0.107	1.51	-0.0123	1.6	-1.61	0.326	0.421	0.433	-1.18
Gcn1l1	E9PVA8	0.650566	0.905438	0.00698722	0.737197	0.00320517	0.00568913	0.889	0.949	0.388	0.927	0.0434	1	FALSE	FALSE	FALSE	FALSE	TRUE	FALSE	-0.254	-0.0662	1.83	0.188	2.09	-1.9	0.378	0.632	0.445	-1.46
Palld	Q9ET54	0.326429	0.814264	0.018849	0.44756	0.00328584	0.0124469	0.779	0.943	0.616	0.889	0.0447	1	FALSE	FALSE	FALSE	FALSE	TRUE	FALSE	-0.365	-0.0853	0.988	0.28	1.35	-1.07	0.134	0.499	0.22	-0.854
Rock2	P70336	0.375718	0.476907	0.0165707	0.854638	0.00345212	0.00471601	0.807	0.899	0.589	0.935	0.0477	1	FALSE	FALSE	FALSE	FALSE	TRUE	FALSE	-0.283	-0.225	0.875	0.0573	1.16	-1.1	0.0917	0.374	0.317	-0.783
Rbm42	Q91V81	0.0343231	0.725724	0.212264	0.0634673	0.0035544	0.12114	0.123	0.936	0.905	0.511	0.0496	1	FALSE	FALSE	FALSE	FALSE	TRUE	FALSE	1.38	0.204	-0.751	-1.18	-2.13	0.955	0.208	-1.17	0.00438	0.959
Gatad2b	Q8VHR5	0.107222	0.855648	0.00024914	0.144608	0.00377663	0.000325134	0.438	0.946	0.0111	0.724	0.0536	1	FALSE	FALSE	TRUE	FALSE	FALSE	FALSE	-1.01	-0.106	-3.14	0.9	-2.13	3.03	-1.06	-0.0556	-0.956	2.07
Sfxn3	Q91V61	0.009117	0.808632	0.621019	0.0139573	0.00386472	0.465413	0.0148	0.943	0.949	0.149	0.0551	1	TRUE	FALSE	FALSE	FALSE	FALSE	FALSE	1.61	0.124	-0.255	-1.48	-1.86	0.38	0.37	-1.24	0.245	0.625
Gatm	Q9D964	0.190047	0.014223	0.000508424	0.151554	0.00468493	0.0662298	0.636	0.0374	0.0293	0.734	0.0712	1	FALSE	TRUE	TRUE	FALSE	FALSE	FALSE	0.589	1.24	2.1	0.651	1.51	-0.863	0.983	0.394	-0.257	-1.12
Cdc5l	Q6A068	0.10222	0.979374	0.000345999	0.097883	0.00582024	0.000333009	0.421	0.953	0.0181	0.632	0.0928	1	FALSE	FALSE	TRUE	FALSE	FALSE	FALSE	0.483	-0.00712	1.42	-0.49	0.935	-1.42	0.473	-0.0094	0.48	-0.944
Tst	P52196	0.550001	0.000360935	0.00218892	0.000909404	0.00607922	0.26681	0.868	1.53e-06	0.147	0.00173	0.0975	1	FALSE	TRUE	FALSE	TRUE	FALSE	FALSE	0.134	1.14	0.885	1.01	0.751	0.255	0.54	0.406	-0.601	-0.345
Hal	P35492	0.302198	0.0103529	0.00113787	0.0667479	0.00668851	0.208323	0.762	0.0206	0.0739	0.526	0.108	1	FALSE	TRUE	FALSE	FALSE	FALSE	FALSE	-0.736	-2.13	-3.04	-1.39	-2.3	0.91	-1.48	-0.739	0.652	1.56
Timm23	Q9WTQ8	0.146126	5.99099e-07	0.000554946	2.51363e-06	0.00687915	0.000119092	0.549	7.3e-14	0.0322	7.22e-14	0.112	1	FALSE	TRUE	TRUE	TRUE	FALSE	FALSE	-0.362	-2.53	-1.14	-2.16	-0.776	-1.39	-1.01	-0.645	1.52	0.132
Gusb	P12265	0.868525	0.00105356	0.00575802	0.00137396	0.00767178	0.319113	0.917	6.31e-05	0.342	0.00434	0.126	1	FALSE	TRUE	FALSE	TRUE	FALSE	FALSE	-0.0418	-1.12	-0.858	-1.07	-0.816	-0.258	-0.504	-0.462	0.612	0.354
Fmr1	P35922	0.0907971	0.159475	0.000404662	0.733111	0.00789062	0.00437413	0.378	0.682	0.0223	0.926	0.13	1	FALSE	FALSE	TRUE	FALSE	FALSE	FALSE	0.625	0.507	1.73	-0.117	1.1	-1.22	0.715	0.0903	0.207	-1.01
Hcfc1	Q61191	0.0756068	0.569092	0.000386381	0.194049	0.00902141	0.00093355	0.314	0.917	0.021	0.781	0.149	1	FALSE	FALSE	TRUE	FALSE	FALSE	FALSE	-1.39	-0.414	-3.66	0.978	-2.26	3.24	-1.37	0.0262	-0.952	2.29
Atxn10	P28658	1.06017e-05	0.346734	0.000628512	3.7493e-06	0.0100032	0.000152723	3.87e-14	0.858	0.0373	2.48e-13	0.165	1	TRUE	FALSE	TRUE	TRUE	FALSE	FALSE	-3.44	0.422	-2.08	3.86	1.35	2.51	-1.27	2.16	-1.7	0.809
Psmb7	P70195	0.0373766	0.270884	0.000245687	0.24641	0.0106982	0.00140134	0.137	0.815	0.0109	0.819	0.176	1	FALSE	FALSE	TRUE	FALSE	FALSE	FALSE	1.45	0.704	3.33	-0.744	1.89	-2.63	1.37	-0.0761	0.668	-1.96
Fkbp9	Q9Z247	0.000216144	7.85025e-05	0.0257664	0.469442	0.0132569	0.00372072	1.84e-07	1.95e-09	0.676	0.893	0.221	1	TRUE	TRUE	FALSE	FALSE	FALSE	FALSE	-1.3	-1.47	-0.605	-0.174	0.695	-0.869	-0.845	0.455	0.63	-0.24
Wdr33	Q8K4P0	0.0117664	0.385508	0.906711	0.00257221	0.0144634	0.328286	0.0238	0.873	0.959	0.0137	0.241	1	TRUE	FALSE	FALSE	TRUE	FALSE	FALSE	-2.1	0.62	-0.0822	2.72	2.02	0.703	-0.39	1.71	-1.01	-0.308
Mrps17	Q9CQE3	0.00347114	0.00206696	0.41773	0.756961	0.0144783	0.00840032	0.00183	0.000457	0.935	0.928	0.241	1	TRUE	TRUE	FALSE	FALSE	FALSE	FALSE	1.37	1.49	0.306	0.115	-1.07	1.18	0.791	-0.58	-0.695	0.485
Sall4	Q8BX22	1.93767e-05	0.571851	9.95592e-07	3.88999e-05	0.0151869	1.70056e-06	2.84e-13	0.917	1.33e-09	6.38e-08	0.252	1	TRUE	FALSE	TRUE	TRUE	FALSE	FALSE	-6.91	-0.538	-9.59	6.37	-2.69	9.05	-4.26	2.65	-3.72	5.33
Nefm	P08553	0.00357164	0.000646019	0.382817	0.304703	0.0167537	0.00270686	0.00195	1.3e-05	0.932	0.848	0.276	1	FALSE	TRUE	FALSE	FALSE	FALSE	FALSE	0.868	1.12	0.21	0.249	-0.658	0.906	0.548	-0.319	-0.568	0.339
Tuba1c	P68373	0.247999	0.00128464	0.0021964	0.00966065	0.0172216	0.74318	0.713	0.000113	0.148	0.0937	0.283	1	FALSE	TRUE	FALSE	FALSE	FALSE	FALSE	1.2	4.33	4	3.13	2.79	0.331	2.38	1.18	-1.95	-1.62
Abce1	P61222	0.00313294	0.905877	0.334674	0.00382648	0.0173739	0.393233	0.00143	0.949	0.927	0.026	0.285	1	TRUE	FALSE	FALSE	TRUE	FALSE	FALSE	-1.13	-0.0356	-0.297	1.1	0.834	0.262	-0.366	0.765	-0.33	-0.0686
Dnajc11	Q5U458	0.000211243	0.000571827	0.0185691	0.506416	0.0178718	0.0582721	1.68e-07	8.65e-06	0.613	0.9	0.292	1	TRUE	TRUE	FALSE	FALSE	FALSE	FALSE	-1.32	-1.16	-0.66	0.162	0.665	-0.503	-0.787	0.538	0.376	-0.127
Mtatp8	P03930	0.00377368	0.000280874	0.3741	0.122999	0.0182865	0.00112438	0.00221	5.99e-07	0.931	0.689	0.298	1	TRUE	TRUE	FALSE	FALSE	FALSE	FALSE	-3.85	-5.58	-0.956	-1.73	2.89	-4.62	-2.59	1.25	2.98	-1.64
Baz1b	Q9Z277	0.00411801	0.772096	0.395896	0.00252497	0.018584	0.263459	0.00267	0.94	0.933	0.0133	0.302	1	TRUE	FALSE	FALSE	TRUE	FALSE	FALSE	-1.75	0.141	-0.421	1.89	1.33	0.562	-0.508	1.24	-0.649	-0.0866
Klc1	O88447	0.00269233	0.338702	0.264293	0.0145899	0.0198153	0.862474	0.001	0.854	0.916	0.156	0.319	1	TRUE	FALSE	FALSE	FALSE	FALSE	FALSE	-1.76	-0.448	-0.527	1.31	1.23	0.0792	-0.683	1.08	-0.236	-0.156
Atp6v0d1	P51863	0.000892569	0.497986	0.0746572	0.00272002	0.0238995	0.227685	4.32e-05	0.904	0.825	0.0151	0.369	1	TRUE	FALSE	FALSE	TRUE	FALSE	FALSE	2.94	0.446	1.26	-2.5	-1.68	-0.814	1.16	-1.78	0.717	-0.0977
Slain2	Q8CI08	0.0337037	0.00418756	0.000505356	0.249444	0.0279784	0.2091	0.12	0.00298	0.0291	0.821	0.412	1	FALSE	TRUE	TRUE	FALSE	FALSE	FALSE	-2.58	-3.86	-5.26	-1.28	-2.69	1.41	-2.92	-0.349	0.933	2.34
Lbr	Q3U9G9	0.0042055	0.789464	0.281851	0.00666058	0.0292383	0.408349	0.00279	0.941	0.919	0.0572	0.424	1	TRUE	FALSE	FALSE	FALSE	FALSE	FALSE	1.75	0.13	0.54	-1.62	-1.21	-0.41	0.604	-1.14	0.474	0.064
Mark3	Q03141	0.0106618	0.00469559	0.000202573	0.638326	0.0296043	0.0676371	0.0199	0.00391	0.00807	0.917	0.427	1	TRUE	TRUE	TRUE	FALSE	FALSE	FALSE	-2.67	-3.09	-4.84	-0.415	-2.17	1.75	-2.65	0.0233	0.438	2.19
Atxn7l3b	Q3UD01	0.00310947	0.191007	0.210598	0.000355421	0.0301197	0.0206991	0.00141	0.734	0.904	0.000164	0.432	1	TRUE	FALSE	FALSE	TRUE	FALSE	FALSE	1.02	-0.369	0.352	-1.39	-0.664	-0.721	0.25	-0.766	0.619	-0.102
Exosc10	P56960	0.000183243	0.000622283	0.00884226	0.41628	0.0315675	0.130491	9.29e-08	1.15e-05	0.445	0.882	0.445	1	TRUE	TRUE	FALSE	FALSE	FALSE	FALSE	2.06	1.76	1.16	-0.305	-0.898	0.593	1.25	-0.817	-0.511	0.0816
Vps26b	Q8C0E2	0.459013	0.00106928	0.116337	0.000337363	0.0319079	0.0183589	0.842	6.57e-05	0.865	0.000142	0.448	1	FALSE	TRUE	FALSE	TRUE	FALSE	FALSE	0.219	-1.29	-0.489	-1.51	-0.708	-0.8	-0.39	-0.609	0.899	0.0994
Peg10	Q7TN75	9.38653e-07	0.0789776	1.08942e-05	1.8708e-07	0.0325805	1.50804e-06	3.87e-14	0.427	1.17e-05	7.22e-14	0.454	1	TRUE	FALSE	TRUE	TRUE	FALSE	FALSE	-6.48	1.21	-4.95	7.69	1.53	6.16	-2.56	3.92	-3.76	2.39
Hist1h1c	P15864	0.00985666	0.000979106	0.477037	0.18795	0.0351114	0.00318096	0.0171	5.14e-05	0.94	0.775	0.474	1	TRUE	TRUE	FALSE	FALSE	FALSE	FALSE	-2.61	-3.77	-0.608	-1.16	2	-3.16	-1.75	0.862	2.02	-1.14
Agps	Q8C0I1	0.000712186	0.0183933	0.0383574	0.0751492	0.0364306	0.678489	2.07e-05	0.0598	0.742	0.56	0.484	1	TRUE	FALSE	FALSE	FALSE	FALSE	FALSE	-1	-0.587	-0.498	0.415	0.504	-0.0892	-0.521	0.48	0.0653	-0.0239
Krt76	Q3UV17	7.1804e-08	4.371e-08	1.53613e-08	0.485169	0.0392123	0.131163	3.87e-14	7.3e-14	8.83e-14	0.896	0.504	1	TRUE	TRUE	TRUE	FALSE	FALSE	FALSE	-11.4	-12	-13.3	-0.599	-1.96	1.36	-9.16	2.2	2.8	4.16
Snx5	Q9D8U8	0.00387632	0.000189174	0.175949	0.0755367	0.0464056	0.0016514	0.00234	1.2e-07	0.894	0.562	0.549	1	TRUE	TRUE	FALSE	FALSE	FALSE	FALSE	-1.89	-2.9	-0.739	-1.01	1.15	-2.16	-1.38	0.51	1.52	-0.643
Nutf2	P61971	0.010528	0.0403714	0.404719	0.452536	0.0469433	0.169194	0.0194	0.194	0.934	0.89	0.552	1	TRUE	FALSE	FALSE	FALSE	FALSE	FALSE	-1.67	-1.25	-0.464	0.417	1.21	-0.79	-0.847	0.824	0.407	-0.383
Ube2z	Q3UE37	0.0125072	0.0558426	0.456329	0.403889	0.0473891	0.195794	0.0265	0.297	0.939	0.879	0.554	1	TRUE	FALSE	FALSE	FALSE	FALSE	FALSE	-1.02	-0.726	-0.26	0.293	0.758	-0.466	-0.501	0.518	0.225	-0.241
Ndufb7	Q9CR61	0.0119997	0.419431	0.392096	0.00291564	0.055723	0.112936	0.0246	0.884	0.933	0.0168	0.595	1	TRUE	FALSE	FALSE	TRUE	FALSE	FALSE	-1.37	0.378	-0.401	1.75	0.97	0.779	-0.349	1.02	-0.726	0.0526
Atxn2	O70305	0.00169243	0.000238052	0.0600483	0.220442	0.0600756	0.00641598	0.000284	2.96e-07	0.801	0.802	0.614	1	TRUE	TRUE	FALSE	FALSE	FALSE	FALSE	1.26	1.65	0.629	0.388	-0.629	1.02	0.883	-0.375	-0.763	0.254
Map2k2	Q63932	0.00494799	0.789439	0.166005	0.00785718	0.0634255	0.250649	0.00401	0.941	0.89	0.071	0.626	1	TRUE	FALSE	FALSE	FALSE	FALSE	FALSE	1.33	0.102	0.553	-1.22	-0.772	-0.452	0.495	-0.83	0.393	-0.0581
Bcl7c	O08664	0.869986	5.23941e-06	0.0875333	4.40805e-06	0.0661601	4.47869e-05	0.917	7.3e-14	0.84	5.96e-13	0.636	1	FALSE	TRUE	FALSE	TRUE	FALSE	FALSE	0.0481	-2.49	-0.542	-2.54	-0.59	-1.95	-0.746	-0.794	1.74	-0.204
Huwe1	Q7TMY8	2.67261e-05	0.839401	0.000381814	2.09174e-05	0.0710079	0.000282967	2.19e-12	0.945	0.0207	3.83e-09	0.652	1	TRUE	FALSE	TRUE	TRUE	FALSE	FALSE	-2.41	0.0694	-1.74	2.48	0.673	1.81	-1.02	1.39	-1.09	0.719
Swi5	Q8K3D3	0.0623481	0.124993	0.91077	0.0036073	0.0756029	0.103796	0.252	0.601	0.959	0.0237	0.666	1	FALSE	FALSE	FALSE	TRUE	FALSE	FALSE	0.746	-0.596	0.0409	-1.34	-0.705	-0.637	0.0478	-0.699	0.644	0.00687
Esrrb	Q61539	0.0184653	0.448613	0.424212	0.0711222	0.0766085	0.965394	0.0491	0.893	0.936	0.544	0.669	1	TRUE	FALSE	FALSE	FALSE	FALSE	FALSE	-1.25	-0.351	-0.371	0.899	0.879	0.0198	-0.493	0.757	-0.142	-0.122
Cpsf3	Q9QXK7	0.0161269	0.25604	0.356288	0.123717	0.083981	0.817142	0.0402	0.804	0.929	0.69	0.688	1	TRUE	FALSE	FALSE	FALSE	FALSE	FALSE	-1.28	-0.536	-0.431	0.748	0.854	-0.106	-0.563	0.721	-0.0265	-0.132
Crmp1	P97427	0.502648	0.0173962	0.273036	0.005318	0.0930636	0.123556	0.856	0.0542	0.917	0.0425	0.709	1	FALSE	FALSE	FALSE	TRUE	FALSE	FALSE	0.211	-0.863	-0.352	-1.07	-0.563	-0.51	-0.251	-0.462	0.612	0.101
Banf1	O54962	0.0946115	0.0982308	0.899036	0.0042699	0.116942	0.079239	0.393	0.512	0.959	0.0307	0.751	1	FALSE	FALSE	FALSE	TRUE	FALSE	FALSE	0.619	-0.611	0.0437	-1.23	-0.575	-0.655	0.0128	-0.606	0.624	-0.0308
Dnajb1	Q9QYJ3	0.81421	0.00150668	0.171506	0.00103244	0.117154	0.0175262	0.911	0.000179	0.892	0.00232	0.751	1	FALSE	TRUE	FALSE	TRUE	FALSE	FALSE	-0.0944	1.69	0.576	1.78	0.67	1.11	0.542	0.636	-1.14	-0.0342
Srsf4	Q8VE97	0.695437	8.70343e-06	0.0606962	1.3579e-05	0.118178	0.000109845	0.896	7.3e-14	0.802	4.53e-10	0.753	1	FALSE	TRUE	FALSE	TRUE	FALSE	FALSE	-0.0756	-1.54	-0.396	-1.47	-0.32	-1.15	-0.503	-0.428	1.04	-0.107
Map1s	Q8C052	0.149106	0.000204784	0.955453	0.00214593	0.136207	0.000189119	0.556	1.65e-07	0.961	0.0103	0.776	1	FALSE	TRUE	FALSE	TRUE	FALSE	FALSE	-1.09	-3.95	0.0401	-2.86	1.13	-3.99	-1.25	-0.158	2.7	-1.29
Usp9x	P70398	0.000522048	0.82473	0.00676698	0.000373789	0.13907	0.00461879	6.76e-06	0.944	0.38	0.000187	0.779	1	TRUE	FALSE	FALSE	TRUE	FALSE	FALSE	-1.86	0.0844	-1.26	1.94	0.597	1.34	-0.758	1.1	-0.842	0.502
Cpsf2	O35218	0.00176338	0.423439	0.025713	0.00697299	0.14143	0.105389	0.000318	0.886	0.676	0.0605	0.782	1	TRUE	FALSE	FALSE	FALSE	FALSE	FALSE	-1.92	-0.381	-1.19	1.54	0.729	0.813	-0.874	1.05	-0.493	0.319
Trappc3	O55013	0.00575504	0.595529	0.0841178	0.00232673	0.146756	0.0332304	0.00559	0.921	0.837	0.0117	0.787	1	TRUE	FALSE	FALSE	TRUE	FALSE	FALSE	-1.28	0.201	-0.702	1.48	0.576	0.903	-0.445	0.833	-0.646	0.257
Lin54	Q571G4	0.00123539	0.0636093	0.00013122	0.0403837	0.154514	0.00295339	0.000114	0.345	0.00401	0.377	0.795	1	TRUE	FALSE	TRUE	FALSE	FALSE	FALSE	-3.82	-1.79	-5.14	2.02	-1.33	3.35	-2.69	1.13	-0.895	2.45
Polr2b	Q8CFI7	0.000794227	0.827974	0.00923976	0.000567149	0.161516	0.00632852	2.99e-05	0.944	0.456	0.000526	0.801	1	TRUE	FALSE	FALSE	TRUE	FALSE	FALSE	-1.43	0.0677	-0.974	1.5	0.459	1.04	-0.585	0.848	-0.653	0.389
Ddah1	Q9CWS0	0.00573536	0.972608	0.000553476	0.00540599	0.172394	0.000525212	0.00555	0.953	0.0321	0.0435	0.81	1	TRUE	FALSE	TRUE	TRUE	FALSE	FALSE	2.88	-0.0291	4.1	-2.91	1.21	-4.13	1.74	-1.15	1.77	-2.36
Ppp6c	Q9CQR6	0.014418	0.00178767	0.149198	0.239132	0.195281	0.0246132	0.0337	0.000301	0.883	0.815	0.826	1	FALSE	TRUE	FALSE	FALSE	FALSE	FALSE	-0.974	-1.39	-0.516	-0.413	0.458	-0.872	-0.719	0.255	0.668	-0.204
Atp6v0a1	Q9Z1G4	0.0118406	0.876995	0.11892	0.0155542	0.20366	0.153052	0.024	0.948	0.867	0.167	0.831	1	TRUE	FALSE	FALSE	FALSE	FALSE	FALSE	2.99	0.155	1.66	-2.84	-1.33	-1.51	1.2	-1.79	1.05	-0.461
Cpsf1	Q9EPU4	0.000166716	0.491592	0.00120208	0.000460319	0.207851	0.00379618	6.18e-08	0.903	0.0779	0.000323	0.834	1	TRUE	FALSE	FALSE	TRUE	FALSE	FALSE	-3.13	-0.386	-2.41	2.75	0.728	2.02	-1.48	1.65	-1.1	0.925
Csnk2b	P67871	0.0125295	0.856867	0.00143643	0.0172253	0.220188	0.00192848	0.0265	0.946	0.0919	0.186	0.841	1	TRUE	FALSE	FALSE	FALSE	FALSE	FALSE	1.89	0.116	2.71	-1.78	0.817	-2.59	1.18	-0.714	1.06	-1.53
Setd3	Q91WC0	0.013713	0.00720449	0.124152	0.714076	0.222335	0.124098	0.031	0.00978	0.87	0.925	0.842	1	TRUE	TRUE	FALSE	FALSE	FALSE	FALSE	-1.26	-1.41	-0.707	-0.159	0.548	-0.707	-0.844	0.411	0.57	-0.137
Tmx1	Q8VBT0	0.00707291	0.470648	0.00086534	0.0255775	0.223366	0.0028399	0.00883	0.898	0.0553	0.266	0.842	1	TRUE	FALSE	FALSE	FALSE	FALSE	FALSE	1.37	0.306	1.9	-1.07	0.53	-1.6	0.896	-0.478	0.59	-1.01
Arglu1	Q3UL36	2.06992e-06	0.870339	7.48978e-06	2.43177e-06	0.231692	8.97101e-06	3.87e-14	0.947	3.96e-06	7.22e-14	0.846	1	TRUE	FALSE	TRUE	TRUE	FALSE	FALSE	5.14	0.0894	4.46	-5.05	-0.679	-4.37	2.42	-2.72	2.33	-2.04
Znf593	Q9DB42	0.948812	0.000181347	0.22063	0.000198667	0.243073	0.00124245	0.924	1.04e-07	0.907	2.78e-05	0.851	1	FALSE	TRUE	FALSE	TRUE	FALSE	FALSE	-0.0173	-1.51	-0.343	-1.49	-0.326	-1.17	-0.467	-0.45	1.04	-0.124
Sumo1	P63166	0.00022152	0.11339	0.0013837	0.00310914	0.24645	0.0250676	2.02e-07	0.566	0.0889	0.0186	0.853	1	TRUE	FALSE	FALSE	TRUE	FALSE	FALSE	4.01	1.24	3.13	-2.77	-0.883	-1.89	2.1	-1.92	0.853	-1.03
Cpsf4	Q8BQZ5	0.00110429	0.665373	0.00823916	0.000559912	0.246777	0.00389728	8.29e-05	0.93	0.428	0.000511	0.853	1	TRUE	FALSE	FALSE	TRUE	FALSE	FALSE	-4.13	0.408	-3	4.54	1.13	3.41	-1.68	2.45	-2.09	1.32
Map1b	P14873	0.0183319	0.776569	0.0023549	0.011106	0.250468	0.00147654	0.0486	0.94	0.159	0.113	0.855	1	TRUE	FALSE	FALSE	FALSE	FALSE	FALSE	1.26	-0.131	1.8	-1.39	0.546	-1.94	0.733	-0.525	0.864	-1.07
Chmp3	Q9CQ10	0.368299	0.00969144	0.804969	0.00202425	0.259291	0.0149688	0.803	0.0182	0.956	0.00926	0.858	1	FALSE	TRUE	FALSE	TRUE	FALSE	FALSE	0.312	-1.05	-0.084	-1.37	-0.396	-0.97	-0.207	-0.519	0.848	-0.122
Lamp2	P17047	0.0683094	0.0128464	0.355758	0.352295	0.308409	0.0674771	0.281	0.0311	0.929	0.865	0.875	1	FALSE	TRUE	FALSE	FALSE	FALSE	FALSE	-1.71	-2.53	-0.812	-0.818	0.899	-1.72	-1.26	0.448	1.27	-0.451
Ncoa5	Q91W39	0.0224579	0.398983	0.133659	0.00499514	0.313714	0.0306068	0.0656	0.878	0.875	0.0388	0.876	1	FALSE	FALSE	FALSE	TRUE	FALSE	FALSE	1.09	-0.358	0.663	-1.45	-0.431	-1.02	0.35	-0.744	0.708	-0.313
Xrcc5	P27641	0.0307629	0.00703055	0.175515	0.409625	0.317466	0.0846339	0.106	0.0093	0.894	0.88	0.877	1	FALSE	TRUE	FALSE	FALSE	FALSE	FALSE	0.889	1.19	0.516	0.305	-0.373	0.677	0.65	-0.239	-0.544	0.133
Gadd45gip1	Q9CR59	0.00114478	0.0288146	0.00631198	0.0814436	0.318613	0.396221	9.21e-05	0.12	0.364	0.583	0.878	1	TRUE	FALSE	FALSE	FALSE	FALSE	FALSE	1.58	0.898	1.21	-0.682	-0.37	-0.312	0.922	-0.658	0.0242	-0.288
Sqstm1	Q64337	0.0288694	0.0014516	0.00517197	0.104277	0.338109	0.453661	0.0964	0.000161	0.317	0.649	0.883	1	FALSE	TRUE	FALSE	FALSE	FALSE	FALSE	-2.83	-4.81	-3.95	-1.98	-1.12	-0.866	-2.9	-0.0681	1.92	1.05
Timm22	Q9CQ85	0.14147	0.0851284	0.563629	0.00560197	0.341587	0.0309291	0.538	0.457	0.946	0.0457	0.884	1	FALSE	FALSE	FALSE	TRUE	FALSE	FALSE	0.915	-1.09	0.342	-2.01	-0.572	-1.44	0.0407	-0.874	1.14	-0.302
Comtd1	Q8BIG7	0.260017	0.00312644	0.0569061	0.0236548	0.361683	0.118576	0.725	0.00139	0.795	0.249	0.888	1	FALSE	TRUE	FALSE	FALSE	FALSE	FALSE	-0.605	-1.95	-1.09	-1.35	-0.485	-0.865	-0.912	-0.307	1.04	0.177
Wdr46	Q9Z0H1	0.00151086	0.00588725	0.0058198	0.425099	0.428801	0.994671	0.000204	0.00639	0.344	0.884	0.901	1	TRUE	TRUE	FALSE	FALSE	FALSE	FALSE	2.98	2.41	2.41	-0.576	-0.571	-0.00474	1.95	-1.03	-0.456	-0.461
Aldh2	P47738	0.00142249	0.910618	0.00524527	0.00170748	0.441816	0.00636604	0.000172	0.95	0.32	0.00675	0.903	1	TRUE	FALSE	FALSE	TRUE	FALSE	FALSE	-2.3	-0.061	-1.88	2.24	0.424	1.82	-1.06	1.24	-0.999	0.817
Pfdn1	Q9CWM4	0.0162013	0.995499	0.0596086	0.0160408	0.465052	0.059029	0.0405	0.954	0.8	0.173	0.907	1	TRUE	FALSE	FALSE	FALSE	FALSE	FALSE	1.47	-0.00295	1.08	-1.47	-0.387	-1.09	0.637	-0.833	0.64	-0.445
Tgm3	Q08189	0.00197543	0.00544675	0.00673032	0.551008	0.474758	0.902528	0.000442	0.00544	0.379	0.906	0.908	1	TRUE	TRUE	FALSE	FALSE	FALSE	FALSE	-3.01	-2.56	-2.47	0.449	0.54	-0.0913	-2.01	0.999	0.551	0.459
Krt8	P11679	0.0163567	0.61041	0.0571623	0.00665999	0.482605	0.0232178	0.0411	0.923	0.795	0.0572	0.909	1	TRUE	FALSE	FALSE	FALSE	FALSE	FALSE	2.61	-0.477	1.95	-3.09	-0.661	-2.42	1.02	-1.59	1.5	-0.927
Eif2b2	Q99LD9	0.249126	0.00101537	0.0830213	0.00743342	0.499394	0.0247275	0.714	5.7e-05	0.835	0.0656	0.912	1	FALSE	TRUE	FALSE	FALSE	FALSE	FALSE	-0.424	-1.58	-0.666	-1.16	-0.243	-0.913	-0.667	-0.244	0.912	-0.000973
Arfgap1	Q9EPJ9	0.0012917	0.251311	0.000446599	0.00956791	0.50072	0.00296875	0.000129	0.8	0.0252	0.0925	0.912	1	TRUE	FALSE	TRUE	FALSE	FALSE	FALSE	2.44	0.674	2.83	-1.76	0.387	-2.15	1.48	-0.954	0.811	-1.34
Ube2i	P63280	0.149655	0.000726928	0.403319	0.00909272	0.507503	0.00287978	0.557	1.96e-05	0.934	0.0866	0.913	1	FALSE	TRUE	FALSE	FALSE	FALSE	FALSE	-1.19	-3.65	-0.667	-2.46	0.526	-2.99	-1.38	-0.186	2.28	-0.711
Gng5	Q80SZ7	0.849357	1.65995e-05	0.403903	2.07901e-05	0.514057	4.69756e-05	0.915	7.3e-14	0.934	3.73e-09	0.914	1	FALSE	TRUE	FALSE	TRUE	FALSE	FALSE	-0.0686	-2.69	-0.307	-2.62	-0.238	-2.38	-0.766	-0.697	1.92	-0.459
Golga3	P55937	7.38561e-05	0.816161	0.000177557	5.447e-05	0.525755	0.000128259	9.99e-10	0.944	0.00653	2.6e-07	0.915	1	TRUE	FALSE	TRUE	TRUE	FALSE	FALSE	-7.4	0.276	-6.64	7.68	0.759	6.92	-3.44	3.96	-3.72	3.2
Trim21	Q62191	3.72039e-05	0.836173	8.30371e-05	2.87779e-05	0.538916	6.31637e-05	1.9e-11	0.945	0.00174	1.7e-08	0.916	1	TRUE	FALSE	TRUE	TRUE	FALSE	FALSE	5.55	-0.17	5.05	-5.72	-0.508	-5.22	2.61	-2.95	2.78	-2.44
Nudcd2	Q9CQ48	0.00255912	0.205798	0.000947231	0.0251868	0.544643	0.00857906	0.000886	0.753	0.0611	0.262	0.917	1	TRUE	FALSE	FALSE	FALSE	FALSE	FALSE	1.42	0.484	1.65	-0.939	0.224	-1.16	0.889	-0.535	0.405	-0.759
Ptrf	O54724	0.00557812	0.885801	0.00199098	0.00435991	0.545123	0.00157361	0.00523	0.948	0.133	0.0316	0.917	1	TRUE	FALSE	FALSE	TRUE	FALSE	FALSE	1.94	-0.0817	2.29	-2.03	0.347	-2.37	1.04	-0.906	1.12	-1.25
Glyr1	Q922P9	0.000178286	0.825232	0.000426232	0.000130873	0.55369	0.000306843	8.28e-08	0.944	0.0238	7.17e-06	0.918	1	TRUE	FALSE	TRUE	TRUE	FALSE	FALSE	-3.42	0.135	-3.06	3.56	0.365	3.19	-1.59	1.84	-1.72	1.47
Emc1	Q8C7X2	0.00289934	0.00381352	0.00782383	0.871079	0.565181	0.677526	0.0012	0.00236	0.415	0.936	0.919	1	TRUE	TRUE	FALSE	FALSE	FALSE	FALSE	-1.17	-1.12	-0.991	0.0499	0.178	-0.128	-0.82	0.35	0.3	0.171
Gigyf2	Q6Y7W8	0.00912199	0.482066	0.00355108	0.0319988	0.586714	0.0121668	0.0148	0.901	0.235	0.318	0.922	1	TRUE	FALSE	FALSE	FALSE	FALSE	FALSE	1.57	0.357	1.85	-1.22	0.275	-1.49	0.946	-0.629	0.588	-0.904
Nolc1	E9Q5C9	0.00276959	0.126632	0.00695892	0.0468092	0.591944	0.117717	0.00108	0.606	0.387	0.419	0.922	1	TRUE	FALSE	FALSE	FALSE	FALSE	FALSE	2.52	1.07	2.16	-1.45	-0.355	-1.1	1.44	-1.08	0.37	-0.726
Naa10	Q9QY36	0.0134068	0.0775294	0.0346136	0.000555687	0.593849	0.00129132	0.0299	0.42	0.726	0.000503	0.922	1	TRUE	FALSE	FALSE	TRUE	FALSE	FALSE	1.33	-0.874	1.09	-2.21	-0.245	-1.96	0.386	-0.945	1.26	-0.7
Pes1	Q9EQ61	0.000589473	0.000372197	0.00132359	0.761645	0.609661	0.421136	1.05e-05	1.69e-06	0.0853	0.929	0.924	1	TRUE	TRUE	FALSE	FALSE	FALSE	FALSE	-2.22	-2.36	-1.98	-0.141	0.238	-0.379	-1.64	0.58	0.72	0.342
Larp7	Q05CL8	0.0439663	0.00738263	0.106048	0.322796	0.610374	0.148252	0.166	0.0103	0.857	0.855	0.924	1	FALSE	TRUE	FALSE	FALSE	FALSE	FALSE	0.935	1.36	0.721	0.423	-0.214	0.636	0.753	-0.182	-0.604	0.0322
Camk2g	Q923T9	0.0504014	0.000120711	0.110424	0.00334268	0.647949	0.00156151	0.195	1.7e-08	0.861	0.021	0.927	1	FALSE	TRUE	FALSE	TRUE	FALSE	FALSE	-0.826	-2.24	-0.651	-1.42	0.175	-1.59	-0.93	-0.104	1.31	-0.279
Afg3l2	Q8JZQ2	0.0176345	0.313292	0.0394978	0.00293631	0.649497	0.00640081	0.0459	0.842	0.746	0.017	0.927	1	TRUE	FALSE	FALSE	TRUE	FALSE	FALSE	-1.01	0.38	-0.845	1.39	0.168	1.23	-0.37	0.643	-0.749	0.476
Gosr1	O88630	0.005829	0.000414195	0.00268166	0.124689	0.649498	0.255303	0.00574	2.55e-06	0.181	0.692	0.927	1	TRUE	TRUE	FALSE	FALSE	FALSE	FALSE	1.71	2.53	1.94	0.823	0.23	0.592	1.55	-0.164	-0.987	-0.394
Crlf1	Q9JM58	0.165366	0.0120471	0.0794713	0.150103	0.659179	0.295572	0.591	0.0277	0.831	0.732	0.928	1	FALSE	TRUE	FALSE	FALSE	FALSE	FALSE	-0.718	-1.47	-0.936	-0.748	-0.218	-0.53	-0.78	-0.062	0.686	0.156
Ddx50	Q99MJ9	0.0928843	0.00808724	0.190414	0.182712	0.660884	0.0888315	0.386	0.0125	0.898	0.77	0.928	1	FALSE	TRUE	FALSE	FALSE	FALSE	FALSE	0.581	1.03	0.439	0.448	-0.141	0.589	0.512	-0.0686	-0.516	0.0728
Ntmt1	Q8R2U4	0.0910952	0.000358343	0.182357	0.00682575	0.672443	0.00329921	0.379	1.49e-06	0.896	0.059	0.929	1	FALSE	TRUE	FALSE	FALSE	FALSE	FALSE	-0.84	-2.36	-0.644	-1.52	0.196	-1.72	-0.962	-0.122	1.4	-0.318
Gcat	O88986	0.00307638	0.000573804	0.00157541	0.309688	0.68719	0.527032	0.00137	8.75e-06	0.102	0.85	0.93	1	TRUE	TRUE	FALSE	FALSE	FALSE	FALSE	-1.15	-1.46	-1.27	-0.317	-0.123	-0.194	-0.97	0.176	0.494	0.299
U2surp	Q6NV83	0.00129922	0.0432832	0.00251198	0.0627144	0.68863	0.123813	0.000131	0.214	0.17	0.507	0.93	1	TRUE	FALSE	FALSE	FALSE	FALSE	FALSE	3.39	1.78	3.08	-1.61	-0.318	-1.29	2.06	-1.33	0.282	-1.01
Xpr1	Q9Z0U0	4.10401e-05	0.958692	6.87444e-05	3.84468e-05	0.690344	6.42257e-05	3.37e-11	0.952	0.00124	6.08e-08	0.93	1	TRUE	FALSE	TRUE	TRUE	FALSE	FALSE	-5.19	0.0401	-4.88	5.23	0.309	4.92	-2.51	2.68	-2.55	2.37
Sars2	Q9JJL8	4.18379e-06	0.166858	6.27122e-06	1.01021e-06	0.703819	1.44219e-06	3.87e-14	0.696	2.37e-06	7.22e-14	0.931	1	TRUE	FALSE	TRUE	TRUE	FALSE	FALSE	-6.9	1.15	-6.59	8.05	0.303	7.75	-3.08	3.81	-4.24	3.51
Pde4dip	Q80YT7	0.670161	0.000838954	0.434871	0.00166442	0.715758	0.00304933	0.892	3.19e-05	0.937	0.00642	0.932	1	FALSE	TRUE	FALSE	TRUE	FALSE	FALSE	-0.17	-1.81	-0.315	-1.64	-0.145	-1.5	-0.574	-0.404	1.24	-0.259
Hip1	Q8VD75	0.862277	0.00150947	0.864967	0.00200517	0.731785	0.0011475	0.916	0.00018	0.958	0.0091	0.933	1	FALSE	TRUE	FALSE	TRUE	FALSE	FALSE	0.0502	1.22	-0.0492	1.17	-0.0995	1.26	0.304	0.254	-0.911	0.353
Slc25a22	Q9D6M3	0.016423	0.000334572	0.0299849	0.0353079	0.734087	0.0193456	0.0414	1.18e-06	0.703	0.343	0.934	1	FALSE	TRUE	FALSE	FALSE	FALSE	FALSE	-0.794	-1.47	-0.698	-0.672	0.0966	-0.768	-0.74	0.0549	0.726	-0.0417
Coa3	Q9D2R6	0.00450135	0.998569	0.00263019	0.00448758	0.751136	0.00262233	0.00324	0.954	0.178	0.033	0.935	1	TRUE	FALSE	FALSE	TRUE	FALSE	FALSE	1.47	-0.000744	1.6	-1.47	0.132	-1.6	0.769	-0.703	0.77	-0.835
Surf4	Q64310	0.0666976	0.00209357	0.113891	0.0676385	0.752545	0.0390099	0.273	0.000473	0.863	0.53	0.935	1	FALSE	TRUE	FALSE	FALSE	FALSE	FALSE	-1.24	-2.48	-1.05	-1.24	0.196	-1.43	-1.19	0.0503	1.29	-0.146
Bckdhb	Q6P3A8	6.28221e-06	0.210131	4.51916e-06	1.6629e-06	0.75754	1.24021e-06	3.87e-14	0.759	8.1e-07	7.22e-14	0.935	1	TRUE	FALSE	TRUE	TRUE	FALSE	FALSE	-6.43	1.01	-6.67	7.44	-0.24	7.68	-3.02	3.41	-4.03	3.65
Ddx41	Q91VN6	0.000318761	0.17111	0.000479644	0.00309093	0.784913	0.0049186	9.47e-07	0.703	0.0274	0.0184	0.937	1	TRUE	FALSE	TRUE	TRUE	FALSE	FALSE	2.11	0.584	2	-1.53	-0.111	-1.42	1.18	-0.939	0.591	-0.828
Pdlim2	Q8R1G6	0.961168	0.0163802	0.844556	0.0178512	0.806784	0.011592	0.925	0.0486	0.957	0.193	0.938	1	FALSE	TRUE	FALSE	FALSE	FALSE	FALSE	-0.0183	-1.05	0.0738	-1.04	0.0921	-1.13	-0.25	-0.232	0.805	-0.324
Fabp3	P11404	0.00353677	0.175219	0.00234927	0.0424095	0.807532	0.0275991	0.00191	0.71	0.159	0.39	0.938	1	TRUE	FALSE	FALSE	FALSE	FALSE	FALSE	2.05	0.79	2.18	-1.26	0.136	-1.39	1.26	-0.793	0.465	-0.928
Samhd1	Q60710	0.0139275	0.278888	0.0205277	0.0978006	0.82632	0.140605	0.0319	0.821	0.633	0.632	0.939	1	TRUE	FALSE	FALSE	FALSE	FALSE	FALSE	-1.13	-0.435	-1.04	0.694	0.0857	0.608	-0.652	0.477	-0.217	0.392
Ada	P03958	0.00431188	0.148172	0.00610113	0.0623975	0.839973	0.0881907	0.00294	0.659	0.356	0.506	0.94	1	TRUE	FALSE	FALSE	FALSE	FALSE	FALSE	1.4	0.597	1.32	-0.799	-0.079	-0.72	0.828	-0.569	0.23	-0.489
Dbt	P53395	5.38461e-06	0.601592	4.42895e-06	9.56167e-06	0.853389	7.78747e-06	3.87e-14	0.922	7.65e-07	6.32e-11	0.941	1	TRUE	FALSE	TRUE	TRUE	FALSE	FALSE	-6.45	-0.401	-6.59	6.05	-0.141	6.19	-3.36	3.09	-2.96	3.23
Gmpr	Q9DCZ1	0.318259	0.00112395	0.249199	0.00619619	0.866178	0.00830409	0.773	7.54e-05	0.913	0.0522	0.941	1	FALSE	TRUE	FALSE	FALSE	FALSE	FALSE	-0.364	-1.56	-0.424	-1.19	-0.0599	-1.13	-0.586	-0.222	0.971	-0.162
Lsm14a	Q8K2F8	0.0342003	0.15539	0.0438576	0.0025364	0.887474	0.00321572	0.122	0.674	0.761	0.0134	0.942	1	FALSE	FALSE	FALSE	TRUE	FALSE	FALSE	-1.34	0.84	-1.26	2.18	0.0794	2.1	-0.44	0.899	-1.28	0.82
Eif5	P59325	0.0115853	0.472749	0.0093262	0.0418083	0.901563	0.0336347	0.0231	0.898	0.458	0.386	0.943	1	TRUE	FALSE	FALSE	FALSE	FALSE	FALSE	1.59	0.386	1.66	-1.2	0.0656	-1.27	0.908	-0.682	0.522	-0.748
Wdhd1	P59328	0.000304666	0.733862	0.000263092	0.000186205	0.920068	0.000161608	7.92e-07	0.937	0.012	2.29e-05	0.944	1	TRUE	FALSE	TRUE	TRUE	FALSE	FALSE	-3.95	0.258	-4.03	4.21	-0.0758	4.29	-1.93	2.02	-2.19	2.1
Pcnp	Q6P8I4	0.0173801	0.0133057	0.0201388	0.879702	0.933572	0.81462	0.0449	0.0332	0.63	0.937	0.945	1	TRUE	TRUE	FALSE	FALSE	FALSE	FALSE	-1.89	-1.99	-1.83	-0.103	0.0569	-0.16	-1.43	0.461	0.564	0.404
Kctd10	Q922M3	0.000113837	0.508109	0.00010188	4.69895e-05	0.93509	4.23648e-05	9.7e-09	0.906	0.00253	1.43e-07	0.945	1	TRUE	FALSE	TRUE	TRUE	FALSE	FALSE	-4.67	0.527	-4.74	5.2	-0.0642	5.26	-2.22	2.45	-2.75	2.52
Mrps33	Q9D2R8	0.307571	0.0011526	0.338304	0.00663871	0.94601	0.00590507	0.766	8.06e-05	0.927	0.057	0.945	1	FALSE	TRUE	FALSE	FALSE	FALSE	FALSE	-0.497	-2.07	-0.465	-1.57	0.0321	-1.61	-0.758	-0.261	1.31	-0.293
Bckdha	P50136	7.98417e-06	0.376558	8.55706e-06	3.07526e-06	0.95003	3.2777e-06	3.87e-14	0.87	5.49e-06	7.22e-14	0.945	1	TRUE	FALSE	TRUE	TRUE	FALSE	FALSE	-7.82	0.872	-7.76	8.7	0.0606	8.64	-3.68	4.15	-4.55	4.08
Lamp1	P11438	0.0153379	0.00428597	0.0139504	0.469702	0.957121	0.50211	0.0372	0.00315	0.552	0.893	0.946	1	TRUE	TRUE	FALSE	FALSE	FALSE	FALSE	-2.55	-3.21	-2.6	-0.658	-0.0483	-0.61	-2.09	0.462	1.12	0.51
Fip1l1	Q9D824	0.00954625	0.179358	0.0102217	0.000907381	0.96886	0.000965101	0.0161	0.717	0.48	0.00172	0.946	1	TRUE	FALSE	FALSE	TRUE	FALSE	FALSE	-2.24	1.01	-2.21	3.25	0.0281	3.22	-0.859	1.38	-1.87	1.35
Gpnmb	Q99P91	5.00211e-05	1.42979e-05	4.88088e-05	0.317008	0.984736	0.325663	1.09e-10	7.3e-14	0.000606	0.852	0.947	1	TRUE	TRUE	TRUE	FALSE	FALSE	FALSE	1.81	2.1	1.82	0.284	0.0053	0.279	1.43	-0.381	-0.665	-0.386
